# Supplementary material for: Antimicrobial Resistance and Prevalence of Extended Spectrum β-Lactamase-Producing Escherichia coli from Dogs and Cats in Northeastern China from 2012 to 2021
Source: MDPI journal article supplement (doi:10.3390/antibiotics11111506), 2022-10-28
Supplement: s1 [file s1]

Supplementary File

**Table S1.** Antibacterial resistance patterns for *E. coli*.

| Antibiotic resistance patterns | Amount |
|--------------------------------|--------|
| AMK                            | 6      |
| AMP                            | 3      |
| ATM                            | 1      |
| GEN                            | 1      |
| SXT                            | 1      |
| TET                            | 15     |
| AMK-CHL                        | 1      |
| AMK-CTX                        | 1      |
| AMK-CRO                        | 1      |
| AMK-AMP                        | 3      |
| AMK-GEN                        | 3      |
| AMK-SXT                        | 1      |
| AMK-TET                        | 11     |
| AMP-CHL                        | 1      |
| AMP-PIP                        | 5      |
| AMP-SXT                        | 1      |
| AMP-TET                        | 3      |
| CHL-TET                        | 1      |
| CTX-AMP                        | 1      |
| GEN-AMP                        | 1      |
| GEN-CAZ                        | 1      |
| SXT-TET                        | 9      |
| AMK-GEN-AMP                    | 4      |
| AMK-AMP-TET                    | 2      |
| AMK-CTX-AMP                    | 1      |
| AMK-CTX-TET                    | 2      |
| AMK-GEN-TET                    | 2      |
| AMK-SXT-TET                    | 2      |
| AMP-PIP-AMC                    | 1      |
| AMP-PIP-SAM                    | 8      |
| AMP-PIP-SXT                    | 2      |
| AMP-PIP-TET                    | 13     |
| AMP-SAM-TET                    | 2      |
| AMP-SXT-TET                    | 3      |
| CFZ-AMP-AMC                    | 1      |
| CFZ-AMP-PIP                    | 1      |
| FEP-AMP-PIP                    | 1      |
| GEN-AMP-SXT                    | 1      |
| GEN-SXT-TET                    | 1      |
| SXT-CHL-TET                    | 1      |
| AMP-PIP-CHL-TET                | 4      |
| AMK-AMP-SXT-TET                | 1      |
| AMK-CTX-AMP-TET                | 1      |
| AMK-SXT-CHL-TET                | 1      |
| AMK-GEN-AMP-SXT                | 1      |
| AMK-GEN-CTX-AMP                | 1      |

---

|                         |    |
|-------------------------|----|
| AMK-GEN-MEN-AMP         | 1  |
| CFZ-AMP-PIP-CHL         | 1  |
| CFZ-AMP-PIP-SAM         | 1  |
| CFZ-AMP-PIP-TET         | 1  |
| CFZ-CTX-AMP-PIP         | 1  |
| AMP-PIP-SXT-TET         | 10 |
| AMP-SAM-CST-TET         | 1  |
| AMP-SAM-SXT-TET         | 2  |
| CAZ-CTX-CRO-AMP         | 1  |
| CFZ-FEP-AMP-PIP         | 1  |
| CIP-LVX-MXF-TET         | 1  |
| GEN-AMP-PIP-SXT         | 1  |
| GEN-AMP-PIP-TET         | 5  |
| GEN-AMP-SXT-TET         | 4  |
| SXT-CIP-MXF-TET         | 1  |
| AMK-AMP-SXT-CHL-TET     | 3  |
| <hr/>                   |    |
| AMK-GEN-AMP-SXT-TET     | 6  |
| AMK-CRO-AMP-SXT-CHL     | 1  |
| AMK-CTX-AMP-CHL-TET     | 1  |
| AMK-GEN-CTX-CRO-TET     | 1  |
| CFZ-AMP-PIP-AMC-SAM     | 1  |
| CFZ-AMP-PIP-CHL-TET     | 1  |
| CFZ-AMP-PIP-SXT-TET     | 2  |
| CFZ-CTX-FEP-AMP-PIP     | 7  |
| AMP-PIP-CIP-LVX-MXF     | 1  |
| AMP-PIP-SAM-CHL-TET     | 2  |
| AMP-PIP-SAM-CST-TET     | 1  |
| AMP-PIP-SAM-SXT-TET     | 1  |
| AMP-PIP-SXT-CHL-TET     | 10 |
| AMP-SAM-SXT-CHL-TET     | 2  |
| CHL-CIP-LVX-MXF-TET     | 1  |
| CTX-AMP-SXT-CHL-TET     | 1  |
| GEN-AMP-PIP-CHL-TET     | 1  |
| GEN-AMP-PIP-SAM-SXT     | 1  |
| GEN-AMP-PIP-SAM-TET     | 2  |
| GEN-AMP-PIP-SXT-TET     | 2  |
| GEN-CTX-CRO-AMP-SXT     | 1  |
| IPM-AMC-SAM-SXT-TET     | 1  |
| SXT-CIP-LVX-MXF-TET     | 1  |
| IPM-CFZ-AMP-PIP-AMC     | 1  |
| GEN-CFZ-AMP-PIP-SXT-TET | 1  |
| GEN-CFZ-CTX-FEP-AMP-PIP | 3  |
| GEN-CTX-CRO-AMP-SXT-TET | 1  |
| AMK-GEN-AMP-PIP-SAM-TET | 1  |
| AMK-CTX-AMP-SXT-CHL-TET | 1  |
| AMK-GEN-CAZ-CTX-CRO-AMP | 1  |
| AMK-GEN-CTX-AMP-SXT-TET | 2  |
| AMK-GEN-CTX-CRO-AMP-SXT | 2  |
| AMP-PIP-CIP-LVX-MXF-TET | 1  |
| CFZ-AMP-PIP-AMC-CHL-TET | 1  |
| CFZ-AMP-PIP-SAM-CHL-TET | 1  |

|                                     |    |
|-------------------------------------|----|
| AMP-PIP-SAM-SXT-CHL-TET             | 1  |
| AMP-CHL-CIP-LVX-MXF-TET             | 1  |
| AMP-SXT-CHL-CIP-LVX-MXF             | 1  |
| CFZ-CTX-FEP-ATM-AMP-PIP             | 5  |
| GEN-AMP-PIP-SXT-CHL-TET             | 4  |
| CTX-CRO-AMP-SXT-CHL-TET             | 1  |
| AMK-GEN-MEN-CTX-CRO-AMP             | 1  |
| AMK-GEN-CAZ-CTX-CRO-AMP-SXT         | 1  |
| AMK-GEN-CAZ-CTX-CRO-AMP-TET         | 2  |
| AMK-CAZ-CTX-CRO-AMP-CHL-TET         | 1  |
| AMK-CAZ-CTX-CRO-AMP-SXT-TET         | 2  |
| AMK-GEN-CTX-AMP-SXT-CHL-TET         | 2  |
| AMK-GEN-CTX-CRO-AMP-SXT-TET         | 1  |
| AMP-PIP-SXT-CIP-LVX-MXF-TET         | 14 |
| CFZ-CTX-AMP-PIP-SXT-CHL-TET         | 3  |
| CFZ-CTX-FEP-AMP-PIP-SXT-TET         | 1  |
| CFZ-CTX-FEP-AMP-PIP-SAM-CHL         | 1  |
| AMP-SXT-CHL-CIP-LVX-MXF-TET         | 2  |
| CFZ-CTX-FEP-ATM-AMP-PIP-TET         | 1  |
| CFZ-FEP-AMP-PIP-SAM-SXT-TET         | 1  |
| CFZ-FEP-ATM-AMP-PIP-SAM-TET         | 1  |
| CFZ-CTX-FEP-ATM-AMP-PIP-CST         | 1  |
| GEN-AMP-PIP-CIP-LVX-MXF-TET         | 1  |
| IPM-CFZ-AMP-PIP-AMC-SXT-TET         | 1  |
| GEN-CFZ-CTX-FEP-AMP-PIP-TET         | 1  |
| GEN-CFZ-CTX-AMP-PIP-SAM-TET         | 1  |
| GEN-CFZ-CTX-FEP-AMP-PIP-SAM         | 4  |
| GEN-AMP-PIP-SXT-CHL-MXF-TET         | 1  |
| GEN-CAZ-CTX-CRO-AMP-SXT-TET         | 1  |
| GEN-CTX-CRO-AMP-SXT-CHL-TET         | 1  |
| GEN-MEN-CAZ-AMP-SXT-CHL-TET         | 1  |
| AMK-GEN-AMP-PIP-SAM-SXT-CHL-TET     | 5  |
| AMK-GEN-CAZ-CTX-CRO-AMP-SXT-TET     | 5  |
| AMK-CAZ-CTX-CRO-AMP-SXT-CHL-TET     | 5  |
| AMK-GEN-CTX-CRO-AMP-SXT-CHL-TET     | 1  |
| AMP-PIP-SXT-CHL-CIP-LVX-MXF-TET     | 1  |
| AMP-SAM-SXT-CHL-CIP-LVX-MXF-TET     | 1  |
| CFZ-CTX-FEP-AMP-PIP-SXT-CHL-TET     | 3  |
| CFZ-CTX-FEP-ATM-AMP-PIP-SAM-CHL     | 1  |
| CFZ-CTX-FEP-ATM-AMP-PIP-SAM-TET     | 1  |
| CFZ-CTX-FEP-ATM-AMP-PIP-SAM-TZP     | 1  |
| GEN-CFZ-CTX-AMP-PIP-SAM-CHL-TET     | 1  |
| GEN-CFZ-CTX-AMP-PIP-SAM-MXF-TET     | 3  |
| GEN-CFZ-CTX-AMP-PIP-SXT-CHL-TET     | 1  |
| GEN-CFZ-CTX-FEP-AMP-PIP-CHL-TET     | 1  |
| GEN-AMP-PIP-SXT-CIP-LVX-MFX-TET     | 1  |
| GEN-CFZ-CTX-FEP-AMP-PIP-SXT-TET     | 2  |
| GEN-CFZ-CTX-FEP-ATM-AMP-PIP-TET     | 3  |
| GEN-CAZ-CTX-CRO-AMP-SXT-CHL-TET     | 2  |
| AMK-GEN-CFZ-AMP-PIP-SAM-SXT-CHL-TET | 1  |
| AMK-GEN-AMP-PIP-SXT-CIP-LVX-MXF-TET | 1  |

|                                                 |    |
|-------------------------------------------------|----|
| AMK-GEN-AMP-PIP-AMC-SAM-SXT-CHL-TET             | 1  |
| AMK-GEN-CAZ-CTX-CRO-AMP-SXT-CHL-TET             | 12 |
| CFZ-CAZ-CTX-FEP-ATM-AMP-PIP-CHL-TET             | 1  |
| CFZ-CTX-FEP-AMP-PIP-AMC-SAM-CHL-TET             | 1  |
| CFZ-CTX-FEP-ATM-AMP-PIP-CIP-LVX-MXF             | 2  |
| CFZ-CTX-FEP-ATM-AMP-PIP-SAM-CHL-TET             | 1  |
| CFZ-CTX-FEP-ATM-AMP-PIP-SXT-CHL-TET             | 4  |
| GEN-AMP-PIP-SAM-SXT-CHL-CIP-MXF-TET             | 1  |
| GEN-AMP-PIP-SAM-SXT-CIP-LVX-MXF-TET             | 3  |
| GEN-AMP-PIP-SXT-CHL-CIP-LVX-MXF-TET             | 4  |
| GEN-CFZ-CTX-FEP-AMP-PIP-SAM-MXF-TET             | 1  |
| GEN-CFZ-CTX-FEP-AMP-PIP-SXT-CHL-TET             | 2  |
| GEN-CFZ-CTX-FEP-ATM-AMP-PIP-SAM-TET             | 1  |
| GEN-CFZ-FEP-AMP-PIP-SAM-SXT-CHL-TET             | 1  |
| AMK-GEN-CFZ-CTX-FEP-AMP-PIP-SAM-SXT-TET         | 4  |
| AMK-GEN-AMP-PIP-SAM-SXT-CIP-LVX-MXF-TET         | 2  |
| AMK-GEN-CFZ-CTX-FEP-ATM-AMP-PIP-SXT-TET         | 2  |
| CFZ-CAZ-CTX-FEP-ATM-AMP-PIP-SAM-CHL-TET         | 1  |
| CFZ-CAZ-AMP-AMC-SAM-SXT-CHL-CIP-LVX-MXF         | 1  |
| AMK-GEN-MEN-CAZ-CTX-CRO-AMP-SXT-CHL-TET         | 1  |
| CFZ-CTX-FEP-ATM-AMP-PIP-CIP-LVX-MXF-TET         | 2  |
| CFZ-CTX-FEP-ATM-AMP-PIP-SAM-CST-SXT-TET         | 1  |
| CFZ-CTX-FEP-ATM-AMP-PIP-SAM-CIP-LVX-MXF         | 1  |
| CFZ-CTX-FEP-ATM-AMP-PIP-CST-CIP-LVX-MXF         | 1  |
| CFZ-CTX-FEP-ATM-AMP-PIP-SAM-SXT-CHL-TET         | 5  |
| GEN-CFZ-CTX-FEP-AMP-PIP-SAM-CIP-MXF-TET         | 1  |
| GEN-CFZ-AMP-PIP-SXT-CHL-CIP-LVX-MXF-TET         | 1  |
| GEN-CFZ-AMP-PIP-SAM-SXT-CIP-LVX-MXF-TET         | 1  |
| GEN-CFZ-CTX-AMP-PIP-CHL-CIP-LVX-MXF-TET         | 1  |
| GEN-CFZ-CTX-FEP-ATM-AMP-PIP-SAM-CHL-TET         | 1  |
| GEN-CFZ-CTX-FEP-ATM-AMP-PIP-SAM-MXF-TET         | 1  |
| GEN-CFZ-CTX-FEP-ATM-AMP-PIP-SXT-CHL-TET         | 2  |
| CFZ-CTX-FEP-ATM-AMP-PIP-SXT-CIP-LVX-MXF-TET     | 2  |
| AMK-GEN-CFZ-CTX-FEP-AMP-PIP-SAM-CHL-CIP-TET     | 1  |
| AMK-GEN-CFZ-CTX-FEP-ATM-AMP-PIP-SAM-SXT-TET     | 2  |
| AMK-GEN-CFZ-CTX-ATM-AMP-PIP-CIP-LVX-MXF-TET     | 1  |
| GEN-CFZ-AMP-PIP-SAM-SXT-CHL-CIP-LVX-MXF-TET     | 1  |
| GEN-CFZ-CTX-AMP-PIP-SXT-CHL-CIP-LVX-MXF-TET     | 2  |
| GEN-CFZ-CTX-FEP-AMP-PIP-CST-SXT-CIP-LVX-MXF     | 1  |
| GEN-CFZ-CTX-FEP-ATM-AMP-PIP-CIP-LVX-MXF-TET     | 8  |
| GEN-CFZ-CTX-FEP-ATM-AMP-PIP-SAM-CIP-MXF-TET     | 1  |
| GEN-CFZ-CTX-FEP-ATM-AMP-PIP-SXT-CHL-MXF-TET     | 1  |
| GEN-CFZ-FEP-AMP-PIP-SAM-CHL-CIP-LVX-MXF-TET     | 1  |
| GEN-CFZ-FEP-AMP-PIP-SXT-CHL-CIP-LVX-MXF-TET     | 1  |
| AMK-GEN-CFZ-CTX-FEP-AMP-PIP-SXT-CIP-LVX-MXF-TET | 1  |
| AMK-GEN-CFZ-CTX-FEP-ATM-AMP-PIP-SAM-SXT-CHL-TET | 1  |
| AMK-GEN-CFZ-AMP-PIP-AMC-SAM-SXT-CIP-LVX-MXF-TET | 1  |
| GEN-CFZ-AMP-PIP-AMC-SAM-SXT-CHL-CIP-LVX-MXF-TET | 1  |
| CFZ-CTX-FEP-ATM-AMP-PIP-SAM-CHL-CIP-LVX-MXF-TET | 1  |
| CFZ-CTX-FEP-ATM-AMP-PIP-SXT-CHL-CIP-LVX-MXF-TET | 3  |
| GEN-CFZ-CTX-FEP-AMP-PIP-SAM-CHL-CIP-LVX-MXF-TET | 1  |

|                                                                                 |    |
|---------------------------------------------------------------------------------|----|
| GEN-CFZ-CTX-FEP-AMP-PIP-SXT-CHL-CIP-LVX-MXF-TET                                 | 9  |
| GEN-CFZ-CTX-FEP-ATM-AMP-PIP-SAM-SXT-CHL-MXF-TET                                 | 1  |
| CFZ-CTX-FEP-ATM-AMP-PIP-CST-SXT-CHL-CIP-LVX-MXF-TET                             | 1  |
| CFZ-CTX-FEP-ATM-AMP-PIP-SAM-SXT-CHL-CIP-LVX-MXF-TET                             | 1  |
| AMK-GEN-CFZ-CTX-FEP-ATM-AMP-PIP-SXT-CIP-LVX-MXF-TET                             | 1  |
| GEN-CFZ-CTX-FEP-AMP-PIP-SAM-SXT-CHL-CIP-LVX-MXF-TET                             | 2  |
| GEN-CFZ-CAZ-AMP-PIP-AMC-SAM-SXT-CHL-CIP-LVX-MXF-TET                             | 1  |
| GEN-CFZ-CAZ-CTX-FEP-ATM-AMP-PIP-CHL-CIP-LVX-MXF-TET                             | 1  |
| GEN-CFZ-CTX-FEP-ATM-AMP-PIP-SAM-SXT-CIP-LVX-MXF-TET                             | 1  |
| GEN-CFZ-CTX-FEP-ATM-AMP-PIP-SXT-CHL-CIP-LVX-MXF-TET                             | 10 |
| AMK-GEN-CFZ-CTX-FEP-AMP-PIP-SAM-CST-SXT-CHL-CIP-LVX-MXF                         | 1  |
| AMK-GEN-CFZ-CTX-FEP-AMP-PIP-SAM-SXT-CHL-CIP-LVX-MXF-TET                         | 1  |
| AMK-GEN-CFZ-CAZ-CTX-FEP-ATM-AMP-PIP-SAM-CIP-LVX-MXF-TET                         | 1  |
| AMK-GEN-CFZ-CTX-FEP-ATM-AMP-PIP-SAM-SXT-CIP-LVX-MXF-TET                         | 1  |
| AMK-GEN-CFZ-CTX-FEP-ATM-AMP-PIP-SXT-CHL-CIP-LVX-MXF-TET                         | 4  |
| CFZ-CAZ-CTX-FEP-ATM-AMP-PIP-SAM-SXT-CHL-CIP-LVX-MXF-TET                         | 1  |
| GEN-CFZ-CAZ-CTX-FEP-ATM-AMP-PIP-SAM-SXT-CIP-LVX-MXF-TET                         | 1  |
| GEN-CFZ-CTX-FEP-ATM-AMP-PIP-SAM-SXT-CHL-CIP-LVX-MXF-TET                         | 5  |
| GEN-CFZ-FEP-ATM-AMP-PIP-SAM-CST-SXT-CHL-CIP-LVX-MXF-TET                         | 1  |
| IPM-MEN-CFZ-CAZ-CTX-FEP-AMP-PIP-AMC-SAM-TZP-SXT-CHL-TET                         | 1  |
| AMK-GEN-CFZ-CAZ-CTX-FEP-ATM-AMP-PIP-SAM-SXT-CIP-LVX-MXF-TET                     | 1  |
| AMK-GEN-CFZ-CTX-FEP-ATM-AMP-PIP-SAM-SXT-CHL-CIP-LVX-MXF-TET                     | 1  |
| AMK-GEN-CFZ-CTX-ATM-AMP-PIP-AMC-SAM-SXT-CHL-CIP-LVX-MXF-TET                     | 1  |
| GEN-CFZ-CAZ-CTX-FEP-ATM-AMP-PIP-SAM-SXT-CHL-CIP-LVX-MXF-TET                     | 1  |
| GEN-CFZ-CTX-FEP-ATM-AMP-PIP-SAM-CST-SXT-CHL-CIP-LVX-MXF-TET                     | 1  |
| AMK-GEN-CFZ-CAZ-CTX-FEP-ATM-AMP-PIP-AMC-SAM-SXT-CIP-LVX-MXF-TET                 | 1  |
| AMK-GEN-CFZ-CAZ-CTX-FEP-ATM-AMP-PIP-SAM-SXT-CHL-CIP-LVX-MXF-TET                 | 2  |
| GEN-CFZ-CAZ-CTX-FEP-ATM-AMP-PIP-AMC-SAM-TZP-SXT-CIP-LVX-MXF-TET                 | 1  |
| GEN-IPM-CFZ-CAZ-CTX-FEP-ATM-AMP-PIP-AMC-SAM-TZP-SXT-CHL-CIP-LVX-MXF-TET         | 1  |
| GEN-IPM-MEN-CFZ-CAZ-CTX-FEP-ATM-AMP-PIP-AMC-SAM-TZP-SXT-CIP-LVX-MXF-TET         | 1  |
| AMK-GEN-IPM-MEN-CFZ-CAZ-CTX-FEP-AMP-PIP-AMC-SAM-TZP-CST-SXT-CHL-CIP-LVX-MXF-TET | 1  |

Table S2. Percentages of antimicrobial resistance in *E. coli* of different origins and years.

| Antibiotic                  | Pet dogs            |                |                 | Working dogs        |                 | Pet cats       |
|-----------------------------|---------------------|----------------|-----------------|---------------------|-----------------|----------------|
|                             | 2012-2013<br>(n=78) | 2015<br>(n=57) | 2021<br>(n=157) | 2012-2013<br>(n=51) | 2021<br>(n=140) | 2021<br>(n=71) |
| Amikacin                    | 74.36%              | 17.54%         | 2.55%           | 78.43%              | 11.43%          | 14.08%         |
| Gentamicin                  | 60.26%              | 59.65%         | 28.03%          | 31.37%              | 40.00%          | 35.21%         |
| Imipenem                    | - <sup>a</sup>      | 0.00%          | 1.91%           | - <sup>a</sup>      | 2.86%           | 0.00%          |
| Meropenem                   | 5.13%               | 0.00%          | 0.00%           | 0.00%               | 2.14%           | 0.00%          |
| Cefazolin                   | - <sup>a</sup>      | 50.88%         | 41.40%          | - <sup>a</sup>      | 37.86%          | 63.38%         |
| Ceftazidime                 | 44.87%              | 7.02%          | 3.82%           | 1.96%               | 3.57%           | 4.23%          |
| Cefotaxime                  | 56.41%              | 45.61%         | 34.39%          | 27.45%              | 30.00%          | 57.75%         |
| Cefepime                    | - <sup>a</sup>      | 43.86%         | 34.39%          | - <sup>a</sup>      | 25.71%          | 57.75%         |
| Aztreonam                   | - <sup>a</sup>      | 19.30%         | 22.93%          | - <sup>a</sup>      | 16.43%          | 45.07%         |
| Ampicillin                  | 83.33%              | 75.44%         | 74.52%          | 41.18%              | 75.71%          | 83.10%         |
| Piperacillin                | - <sup>a</sup>      | 71.93%         | 68.79%          | - <sup>a</sup>      | 68.57%          | 81.69%         |
| Amoxicillin-Clavulanic acid | - <sup>a</sup>      | 3.51%          | 3.18%           | - <sup>a</sup>      | 6.43%           | 5.63%          |
| Ampicillin-Sulbactam        | - <sup>a</sup>      | 31.58%         | 21.66%          | - <sup>a</sup>      | 32.14%          | 33.80%         |

|                               |                |                |                |                |                |                |
|-------------------------------|----------------|----------------|----------------|----------------|----------------|----------------|
| Piperacillin-Tazobactam       | - <sup>a</sup> | 0.00%          | 0.64%          | -              | 2.14%          | 2.82%          |
| Colistin                      | 0%             | 5.26%          | 3.82%          | 0%             | 0.71%          | 1.41%          |
| Trimethoprim-Sulfamethoxazole | 67.95%         | 49.12%         | 50.32%         | 25.49%         | 50.71%         | 36.62%         |
| Chloramphenicol               | 38.46%         | 28.07%         | 33.76%         | 11.76%         | 42.86%         | 23.94%         |
| Ciprofloxacin                 | - <sup>a</sup> | 49.12%         | 32.48%         | - <sup>a</sup> | 20.71%         | 33.80%         |
| Levofloxacin                  | - <sup>a</sup> | 47.37%         | 31.85%         | - <sup>a</sup> | 18.57%         | 33.80%         |
| Moxifloxacin                  | - <sup>a</sup> | 47.37%         | 33.12%         | - <sup>a</sup> | 25.00%         | 35.21%         |
| Tetracycline                  | 71.79%         | 59.65%         | 65.61%         | 54.90%         | 80.00%         | 60.56%         |
| Ceftriaxone                   | 56.41%         | - <sup>a</sup> | - <sup>a</sup> | 3.92%          | - <sup>a</sup> | - <sup>a</sup> |

<sup>a</sup> The antibiotic resistance was not tested.

**Table S3.** Drug resistance pattern of *E. coli*.

| Resistance pattern | 2012-2013<br>(n=78) | Pet dogs    |              | Working dogs     |              | Pet cats    |
|--------------------|---------------------|-------------|--------------|------------------|--------------|-------------|
|                    |                     | 2015 (n=57) | 2021 (n=157) | 2012-2013 (n=51) | 2021 (n=140) | 2021 (n=71) |
| 0R                 | 5.13%               | 17.54%      | 16.56%       | 7.84%            | 16.43%       | 11.27%      |
| 1R                 | 3.85%               | 1.75%       | 7.64%        | 17.65%           | 4.29%        | 5.63%       |
| 2R                 | 14.10%              | 7.02%       | 13.38%       | 33.33%           | 6.43%        | 11.27%      |
| 3R                 | 7.69%               | 8.77%       | 7.64%        | 19.61%           | 12.86%       | 11.27%      |
| 4R                 | 19.23%              | 10.53%      | 17.83%       | 7.84%            | 10.71%       | 9.86%       |
| 5R                 | 19.23%              | 14.04%      | 3.18%        | 7.84%            | 7.14%        | 2.82%       |
| 6R                 | 28.21%              | 8.77%       | 5.73%        | 5.88%            | 17.14%       | 7.04%       |
| 7R                 | 2.56%               | 3.51%       | 6.37%        | 0.00%            | 10.00%       | 21.13%      |
| 8R                 | 0.00%               | 12.28%      | 8.92%        | 0.00%            | 7.14%        | 8.45%       |
| 9R                 | -                   | 14.04%      | 8.92%        | -                | 4.29%        | 4.23%       |
| 10R                | -                   | 1.75%       | 2.55%        | -                | 2.14%        | 4.23%       |
| 11R                | -                   | 0.00%       | 0.64%        | -                | 0.71%        | 2.82%       |
| 12R                | -                   | 0.00%       | 0.64%        | -                | 0.71%        | 0.00%       |

**Table S4.** Percentage of antimicrobial resistance in ESBL-*E. coli* of different origins and years.

| Antibiotic              | Pet dogs            |                | Working dogs   |                | Pet cats       |
|-------------------------|---------------------|----------------|----------------|----------------|----------------|
|                         | 2012-2013<br>(n=41) | 2015<br>(n=27) | 2021<br>(n=60) | 2021<br>(n=48) | 2021<br>(n=43) |
| Amikacin                | 14.63%              | 29.63%         | 6.67%          | 12.50%         | 23.26%         |
| Gentamicin              | 70.73%              | 85.19%         | 58.33%         | 72.92%         | 53.49%         |
| Imipenem                | 0.00%               | 0.00%          | 1.67%          | 6.25%          | 0.00%          |
| Meropenem               | 0.00%               | 0.00%          | 0.00%          | 6.25%          | 0.00%          |
| Cefazolin               | 100.00%             | 100.00%        | 100.00%        | 100.00%        | 100.00%        |
| Ceftazidime             | 19.51%              | 14.81%         | 8.33%          | 10.42%         | 6.98%          |
| Cefotaxime              | 100.00%             | 96.30%         | 90.00%         | 87.50%         | 95.35%         |
| Cefepime                | 95.12%              | 92.59%         | 90.00%         | 72.92%         | 95.35%         |
| Aztreonam               | 73.17%              | 40.74%         | 58.33%         | 47.92%         | 74.42%         |
| Ampicillin              | 100.00%             | 100.00%        | 100.00%        | 100.00%        | 100.00%        |
| Piperacillin            | 100.00%             | 100.00%        | 100.00%        | 100.00%        | 100.00%        |
| Amoxicillin-Clavulanate | 4.88%               | 3.70%          | 1.67%          | 10.42%         | 4.65%          |
| Ampicillin-Sulbactam    | 41.46%              | 48.15%         | 38.33%         | 52.08%         | 37.21%         |
| Piperacillin-Tazobactam | 2.44%               | 0.00%          | 1.67%          | 6.25%          | 4.65%          |
| Colistin                | 0.00%               | 11.11%         | 6.67%          | 2.08%          | 2.33%          |

|                               |        |        |        |        |        |
|-------------------------------|--------|--------|--------|--------|--------|
| Trimethoprim-Sulfamethoxazole | 90.24% | 51.85% | 76.67% | 56.25% | 44.19% |
| Chloramphenicol               | 58.54% | 44.44% | 71.67% | 52.08% | 32.56% |
| Ciprofloxacin                 | 80.49% | 66.67% | 53.33% | 33.33% | 55.81% |
| Levofloxacin                  | 78.05% | 62.96% | 53.33% | 29.17% | 55.81% |
| Moxifloxacin                  | 78.05% | 62.96% | 55.00% | 43.75% | 58.14% |
| Tetracycline                  | 82.93% | 62.96% | 83.33% | 97.92% | 76.74% |

Table S5. Drug resistance pattern of ESBL-*E. coli*.

|                   | 2012-2013 | Pet dogs<br>2015 | 2021   | Working dogs<br>2021 | Pet cats<br>2021 |
|-------------------|-----------|------------------|--------|----------------------|------------------|
| 3R <sup>a</sup>   | 0.00%     | 3.70%            | 6.67%  | 0.00%                | 11.63%           |
| 4R <sup>a</sup>   | 4.88%     | 11.11%           | 3.33%  | 4.17%                | 4.65%            |
| 5R <sup>a</sup>   | 4.88%     | 18.52%           | 5.00%  | 6.25%                | 4.65%            |
| 6R <sup>a</sup>   | 12.20%    | 3.70%            | 13.33% | 22.92%               | 11.63%           |
| 7R <sup>a</sup>   | 17.07%    | 3.70%            | 15.00% | 25.00%               | 34.88%           |
| 8R <sup>a</sup>   | 24.39%    | 25.93%           | 23.33% | 18.75%               | 13.95%           |
| 9R <sup>a</sup>   | 14.63%    | 29.63%           | 23.33% | 12.50%               | 6.98%            |
| 10R <sup>a</sup>  | 21.95%    | 3.70%            | 6.67%  | 6.25%                | 6.98%            |
| 11R <sup>a</sup>  | 0.00%     | 0.00%            | 1.67%  | 2.08%                | 4.65%            |
| 12R <sup>a</sup>  | 0.00%     | 0.00%            | 1.67%  | 2.08%                | 0.00%            |
| ≥ 7R <sup>a</sup> | 78.05%    | 62.96%           | 71.67% | 66.67%               | 67.44%           |

<sup>a</sup> The antibiotics categories.

Table S6. Detection rates of drug resistance genes.

|                                    | Genes                 | AG-type<br>(AMK&GEN)<br>(n=34)                             | A-type (AMK)<br>(n=34)                               | G-type (GEN)<br>(n=111)            | Drug sensitive<br>type (n=74) |
|------------------------------------|-----------------------|------------------------------------------------------------|------------------------------------------------------|------------------------------------|-------------------------------|
| aminoglycosides                    | <i>armA</i>           | 8.82% (3/34)                                               | 8.82% (3/34)                                         | 0%                                 | 0%                            |
|                                    | <i>rmtB</i>           | 91.18% (31/34)                                             | 91.18% (31/34)                                       | 0.90% (1/111)                      | 0%                            |
|                                    | <i>aac (3)-II</i>     | 55.88% (19/34)                                             | 55.88% (19/34)                                       | 72.97% (81/111)                    | 1.35% (1/74)                  |
|                                    | <i>aac (6')-Ib</i>    | 29.41% (10/34)                                             | 29.41% (10/34)                                       | 15.32% (17/111)                    | 2.70% (2/74)                  |
| trimethoprim-sul-<br>famethoxazole | Genes                 | Drug resistant<br>type (n=143)                             | Drug sensitive<br>type (n=76)                        |                                    |                               |
|                                    | <i>sul1</i>           | 48.95% (70/143)                                            | 7.89% (6/76)                                         |                                    |                               |
|                                    | <i>sul2</i>           | 79.02% (113/143)                                           | 25% (19/76)                                          |                                    | -                             |
|                                    | <i>sul3</i>           | 19.58% (28/143)                                            | 1.32% (1/76)                                         |                                    |                               |
| phenicols                          | Genes                 | Drug resistant<br>type (n=118)                             | Drug sensitive<br>type (n=82)                        | Intermediately<br>sensitive (n=19) |                               |
|                                    | <i>folR</i>           | 80.51% (95/118)                                            | 0%                                                   | 0%                                 |                               |
|                                    | <i>cmlA</i>           | 31.36% (37/118)                                            | 10.98% (9/82)                                        | 52.63% (10/19)                     | -                             |
| fluoroquinolones                   | Genes                 | Resistant to any<br>antibiotic<br>(CIP/LVX/MXF)<br>(n=130) | Sensitive or in-<br>termediately<br>sensitive (n=89) |                                    |                               |
|                                    | <i>qnrA</i>           | 0%                                                         | 0%                                                   |                                    |                               |
|                                    | <i>qnrB</i>           | 1.54% (2/130)                                              | 1.12% (1/89)                                         |                                    |                               |
|                                    | <i>qnrC</i>           | 0%                                                         | 0%                                                   |                                    | -                             |
|                                    | <i>qnrS</i>           | 16.15% (21/130)                                            | 47.19% (42/89)                                       |                                    |                               |
|                                    | <i>aac (6')-Ib-cr</i> | 9.23% (12/130)                                             | 5.62% (5/89)                                         |                                    |                               |

|               | Genes              | Drug resistant type (n=181) | Drug sensitive type (n=38) |
|---------------|--------------------|-----------------------------|----------------------------|
| tetracyclines | <i>tet</i> (A)     | 85.08% (154/181)            | 2.63% (1/38)               |
|               | <i>tet</i> (B)     | 21.55% (39/181)             | 0%                         |
|               | <i>tet</i> (M)     | 3.31% (6/181)               | 0%                         |
|               | <i>tet</i> (X1-X5) | 0%                          | 0%                         |

Table S7. Phylogenetic grouping of *E. coli* in 2021.

| phylogenetic grouping | All    | pet dogs | pet cats | working dogs |
|-----------------------|--------|----------|----------|--------------|
| A                     | 37.77% | 33.76%   | 5.63%    | 58.57%       |
| B1                    | 30.16% | 30.57%   | 35.21%   | 27.14%       |
| B2                    | 16.03% | 17.20%   | 42.25%   | 1.43%        |
| C                     | 2.99%  | 0.64%    | 4.23%    | 5.00%        |
| D                     | 1.09%  | 2.55%    | 0.00%    | 0.00%        |
| E                     | 4.89%  | 5.73%    | 2.82%    | 5.00%        |
| F                     | 6.79%  | 8.92%    | 9.86%    | 2.86%        |
| E.clades              | 0.27%  | 0.64%    | 0.00%    | 0.00%        |
| B2+D                  | 17.12% | 19.75%   | 42.25%   | 1.43%        |
| A+C                   | 40.76% | 34.39%   | 9.86%    | 63.57%       |

Table S8. Phylogenetic grouping of ESBL-*E. coli*.

| Phylogenetic grouping | 2012–2013<br>Pet dogs | 2015<br>Pet dogs | 2021<br>Pet dogs | 2021<br>Pet cats | 2021<br>Working dogs |
|-----------------------|-----------------------|------------------|------------------|------------------|----------------------|
| A                     | 29.27%                | 0.00%            | 26.67%           | 2.33%            | 47.92%               |
| B1                    | 26.83%                | 29.63%           | 30.00%           | 41.86%           | 33.33%               |
| B2                    | 2.44%                 | 25.93%           | 18.33%           | 30.23%           | 2.08%                |
| C                     | 4.88%                 | 25.93%           | 1.67%            | 6.98%            | 6.25%                |
| D                     | 4.88%                 | 0.00%            | 3.33%            | 0.00%            | 0.00%                |
| E                     | 9.76%                 | 11.11%           | 6.67%            | 2.33%            | 6.25%                |
| F                     | 19.51%                | 7.41%            | 13.33%           | 16.28%           | 4.17%                |
| E.clades              | 2.44%                 | 0.00%            | 0.00%            | 0.00%            | 0.00%                |
| B2+D                  | 7.32%                 | 25.93%           | 21.67%           | 30.23%           | 2.08%                |
| A+C                   | 34.15%                | 25.93%           | 28.33%           | 9.30%            | 54.17%               |

Table S9. Collection Information of *E. coli*.

| Sampling date | Isolate ID | Age | Gender   | Disease    | Location                            | Animal  |
|---------------|------------|-----|----------|------------|-------------------------------------|---------|
| 2012-2013     | s4a        | <1  | Un-known | Diar-rheic | Jilin Veterinary Research Institute | Pet dog |
|               | s7a        | <1  | Male     | Diar-rheic |                                     |         |
|               | s9a        | <1  | Male     | Diar-rheic |                                     |         |
|               | s10        | <1  | Female   | Diar-rheic |                                     |         |
|               | s17a       | <1  | Female   | Others     |                                     |         |
|               | s21a       | <1  | Male     | Others     | Zhou Ping Pet Hospital              | Pet dog |
|               | z3a        | 1–5 | Female   | Diar-rheic |                                     |         |
|               | z4a        | >10 | Male     | Others     |                                     |         |
|               | z5e        | 1–5 | Male     | Others     |                                     |         |



|         |          |          |           |                        |         |
|---------|----------|----------|-----------|------------------------|---------|
| z6a     | <1       | Female   | Diarrheic | Chuncheng Pet Hospital | Pet dog |
| z7a     | 1–5      | Female   | Others    |                        |         |
| z8a     | <1       | Female   | Diarrheic |                        |         |
| z9a     | <1       | Female   | Others    |                        |         |
| z10a    | <1       | Male     | Diarrheic |                        |         |
| z11a    | <1       | Female   | Diarrheic |                        |         |
| z12a    | <1       | Female   | Diarrheic |                        |         |
| z13a    | <1       | Male     | Diarrheic |                        |         |
| z14a    | <1       | Female   | Diarrheic |                        |         |
| z16a    | <1       | Female   | Diarrheic |                        |         |
| z17a    | <1       | Male     | Diarrheic |                        |         |
| z18a    | <1       | Male     | Diarrheic |                        |         |
| z22a    | 6–10     | Male     | Others    |                        |         |
| z23-2a  | 6–10     | Female   | Others    |                        |         |
| z23-3a  | 6–10     | Female   | Others    |                        |         |
| z23-4a  | 1–5      | Male     | Others    |                        |         |
| z24a    | <1       | Male     | Diarrheic |                        |         |
| z25a    | <1       | Female   | Others    |                        |         |
| z28a    | <1       | Male     | Others    |                        |         |
| z30a    | <1       | Female   | Diarrheic |                        |         |
| z34a    | 1–5      | Male     | Health    |                        |         |
| z35a    | 1–5      | Male     | Health    |                        |         |
| z36a    | <1       | Female   | Others    |                        |         |
| z40a    | <2       | Female   | Diarrheic |                        |         |
| z41a    | 1–5      | Male     | Others    |                        |         |
| z42a    | <1       | Male     | Diarrheic |                        |         |
| z43a    | <1       | Male     | Diarrheic |                        |         |
| z45a    | 1–5      | Male     | Others    |                        |         |
| z46a    | <1       | Male     | Others    |                        |         |
| z47a    | <1       | Male     | Others    |                        |         |
| z48a    | <1       | Male     | Others    |                        |         |
| 1123a   | Un-known | Un-known | Un-known  | Chuncheng Pet Hospital | Pet dog |
| 1126-1a | Un-known | Un-known | Un-known  |                        |         |

|         |          |          |            |
|---------|----------|----------|------------|
| 1126-3a | Un-known | Un-known | Un-known   |
| 1128a   | Un-known | Un-known | Un-known   |
| 1129-2a | Un-known | Un-known | Un-known   |
| 1130-1a | Un-known | Un-known | Un-known   |
| 1130-2b | Un-known | Un-known | Un-known   |
| 1130d   | Un-known | Un-known | Un-known   |
| 1141a   | Un-known | Un-known | Un-known   |
| 1158c   | Un-known | Un-known | Un-known   |
| 1160a   | Un-known | Un-known | Un-known   |
| 1202-1a | Un-known | Un-known | Un-known   |
| 1202-2a | Un-known | Un-known | Un-known   |
| 1203a   | Un-known | Un-known | Un-known   |
| 1207-1a | Un-known | Un-known | Diar-rheic |
| 1207-2b | Un-known | Un-known | Un-known   |
| 1208-2a | Un-known | Un-known | Un-known   |
| 1209-1a | Un-known | Un-known | Un-known   |
| 1211-2a | <1       | Un-known | Diar-rheic |
| 1212-2a | Un-known | Un-known | Diar-rheic |
| 1215-1a | Un-known | Un-known | Un-known   |
| 1215-2a | Un-known | Un-known | Un-known   |
| 1217-2a | Un-known | Un-known | Un-known   |
| 1217-3c | Un-known | Un-known | Un-known   |
| 1219a   | Un-known | Un-known | Un-known   |
| 1221-2a | Un-known | Un-known | Un-known   |
| 1226-1a | Un-known | Un-known | Un-known   |

|      |           |          |          |           |                        |         |
|------|-----------|----------|----------|-----------|------------------------|---------|
|      | 1228-2a   | Un-known | Un-known | Un-known  |                        |         |
|      | 1228c     | Un-known | Un-known | Un-known  |                        |         |
|      | 1230-1a   | Un-known | Un-known | Un-known  |                        |         |
|      | 130107-1a | Un-known | Un-known | Un-known  |                        |         |
|      | 130107-2d | Un-known | Un-known | Un-known  |                        |         |
|      | C2a       | Un-known | Un-known | Un-known  |                        |         |
|      | C4a       | Un-known | Un-known | Un-known  |                        |         |
|      | c6a       | Un-known | Un-known | Un-known  |                        |         |
|      | c7a       | Un-known | Un-known | Un-known  |                        |         |
|      | c8a       | Un-known | Un-known | Un-known  |                        |         |
|      | c9a       | Un-known | Un-known | Un-known  |                        |         |
| 2015 | 528-2     | >10      | Male     | Others    | Zhou Ping Pet Hospital | Pet dog |
|      | 528-4     | 6-10     | Male     | Others    |                        |         |
|      | 528-11    | <1       | Female   | Others    |                        |         |
|      | 528-12    | <1       | Male     | Others    |                        |         |
|      | 528-14    | 6-10     | Male     | Others    |                        |         |
|      | 528-15    | 6-10     | Female   | Un-known  |                        |         |
|      | 528-16    | 6-10     | Female   | Others    |                        |         |
|      | 528-17    | <1       | Male     | Others    |                        |         |
|      | 528-19    | <1       | Female   | Others    |                        |         |
|      | 528-21    | 1–5      | Female   | Others    |                        |         |
|      | 528-22    | 1–5      | Female   | Others    |                        |         |
|      | 528-23    | 1–5      | Male     | Un-known  |                        |         |
|      | 604-24    | <1       | Female   | Others    |                        |         |
|      | 529-41    | 1–5      | Male     | Diarrheic |                        |         |
|      | 601-42    | <1       | Male     | Others    |                        |         |
|      | 601-43    | 1-5      | Female   | Diarrheic |                        |         |
|      | 601-44    | 6–10     | Female   | Others    |                        |         |
|      | 529-45    | <1       | Male     | Others    |                        |         |
|      | 603-46    | 6–10     | Male     | Others    |                        |         |
|      | 601-48-2  | <1       | Female   | Others    |                        |         |
|      | 603-53    | <1       | Male     | Others    |                        |         |
|      | 601-61    | <1       | Male     | Others    |                        |         |
|      | 601-62    | Un-known | Un-known | Others    |                        |         |

|          |          |        |            |
|----------|----------|--------|------------|
| 601-64   | 1-5      | Female | Diar-rheic |
| 603-66-2 | <1       | Female | Un-known   |
| 601-67   | 6–10     | Female | Others     |
| 601-68   | <1       | Female | Others     |
| 603-71   | 1–5      | Female | Diar-rheic |
| 601-78   | Un-known | Female | Others     |
| 529-79   | <1       | Female | Un-known   |
| 604-80   | <1       | Male   | Un-known   |
| 601-81   | <1       | Female | Un-known   |
| 601-82   | 1-5      | Male   | Un-known   |
| 601-83   | <1       | Male   | Others     |
| 603-86   | <2       | Male   | Others     |
| 603-88   | 1–5      | Female | Un-known   |
| 603-90   | Un-known | Male   | Others     |
| 604-93   | 1–5      | Male   | Un-known   |
| 604-96   | Un-known | Female | Diar-rheic |
| 604-100  | <1       | Male   | Diar-rheic |
| 604-101  | Un-known | Male   | Others     |
| 604-103  | Un-known | Male   | Un-known   |
| 603-109  | >10      | Male   | Others     |
| 604-111  | Un-known | Female | Un-known   |
| 604-112  | <1       | Female | Un-known   |
| 603-113  | <1       | Female | Un-known   |
| 529-a2   | 6–10     | Male   | Others     |
| 529-a3   | >10      | Male   | Others     |
| 529-a4   | 1–5      | Female | Others     |
| 529-a5   | 1–5      | Female | Health     |
| 529-a6   | 1–5      | Female | Diar-rheic |
| 603-a9   | 1–5      | Female | Others     |
| 603-c1   | 1–5      | Female | Others     |
| 604-C6   | <1       | Male   | Others     |
| 603-CB2  | Adult    | Male   | Others     |

|      | 604-CB3<br>604-CB4 | Adult<br>Adult | Female<br>Female | Others<br>Others |                        |         |
|------|--------------------|----------------|------------------|------------------|------------------------|---------|
| 2021 | HP121              | >10            | Male             | Diar-rheic       | Zhou Ping Pet Hospital | Pet dog |
|      | HP123              | 1-5            | Male             | Health           |                        |         |
|      | HP124              | 1-5            | Female           | Others           |                        |         |
|      | HP125              | >10            | Female           | Health           |                        |         |
|      | HP126              | 1-5            | Male             | Diar-rheic       |                        |         |
|      | HP129              | 1-5            | Female           | Others           |                        |         |
|      | HP131              | <1             | Male             | Un-known         |                        |         |
|      | HP132              | <1             | Male             | Un-known         |                        |         |
|      | HP133              | <1             | Male             | Un-known         |                        |         |
|      | HP134              | <1             | Female           | Un-known         |                        |         |
|      | HP135              | <1             | Female           | Un-known         |                        |         |
|      | HP136              | <1             | Female           | Un-known         |                        |         |
|      | HP137              | <1             | Female           | Un-known         |                        |         |
|      | HP138              | 1-5            | Female           | Un-known         |                        |         |
|      | HP140              | >10            | Female           | Un-known         |                        |         |
|      | HP142              | 1-5            | Un-known         | Un-known         |                        |         |
|      | HP143              | 1-5            | Un-known         | Un-known         |                        |         |
|      | HP144              | 1-5            | Male             | Others           |                        |         |
|      | HP145              | Un-known       | Un-known         | Un-known         |                        |         |
|      | HP146              | 1-5            | Female           | Un-known         |                        |         |
|      | HP147              | 1-5            | Male             | Health           |                        |         |
|      | HP148              | 1-5            | Male             | Others           |                        |         |
|      | HP152              | 1-5            | Male             | Un-known         |                        |         |
|      | HP155              | 1-5            | Male             | Un-known         |                        |         |
|      | HP156              | 1-5            | Female           | Un-known         |                        |         |
|      | HP157              | 1-5            | Female           | Un-known         |                        |         |
|      | HP158              | 1-5            | Male             | Un-known         |                        |         |
|      | HP160              | 1-5            | Male             | Un-known         |                        |         |

|       |          |          |            |
|-------|----------|----------|------------|
| HP161 | 1–5      | Female   | Un-known   |
| HP162 | 1–5      | Male     | Un-known   |
| HP164 | 1–5      | Male     | Un-known   |
| HP169 | 1–5      | Male     | Un-known   |
| HP174 | <1       | Female   | Un-known   |
| HP175 | <1       | Female   | Un-known   |
| HP176 | 1–5      | Female   | Un-known   |
| HP179 | 1–5      | Male     | Un-known   |
| HP181 | 1–5      | Male     | Un-known   |
| HP182 | 6–10     | Female   | Un-known   |
| HP192 | 1–5      | Male     | Un-known   |
| HP194 | Un-known | Un-known | Un-known   |
| HP196 | 6–10     | Female   | Un-known   |
| HP197 | <1       | Male     | Un-known   |
| HP198 | 1–5      | Male     | Others     |
| HP199 | 1–5      | Female   | Health     |
| HP200 | 1–5      | Male     | Others     |
| HP201 | <1       | Male     | Diar-rheic |
| HP203 | 1–5      | Male     | Health     |
| HP204 | 1–5      | Female   | Health     |
| HP206 | <1       | Male     | Diar-rheic |
| HP207 | Un-known | Un-known | Un-known   |
| HP208 | <1       | Male     | Health     |
| HP209 | <1       | Male     | Health     |
| HP210 | <1       | Male     | Diar-rheic |
| HP211 | <1       | Male     | Diar-rheic |
| HP213 | <1       | Male     | Health     |
| HP214 | <1       | Male     | Diar-rheic |
| HP219 | 6–10     | Female   | Others     |
| HP221 | 1–5      | Female   | Diar-rheic |

|       |          |          |           |
|-------|----------|----------|-----------|
| HP222 | Un-known | Female   | Others    |
| HP224 | <1       | Un-known | Diarrheic |
| HP225 | <1       | Female   | Diarrheic |
| HP226 | 1–5      | Female   | Others    |
| HP230 | >10      | Female   | Others    |
| HP232 | 6–10     | Female   | Others    |
| HP233 | 6–10     | Female   | Others    |
| HP235 | 6–10     | Female   | Others    |
| HP236 | 1–5      | Male     | Others    |
| HP237 | 6–10     | Un-known | Others    |
| HP238 | 1–5      | Male     | Others    |
| HP239 | <1       | Male     | Others    |
| HP241 | 1–5      | Male     | Diarrheic |
| HP242 | 6–10     | Un-known | Health    |
| HP244 | 1–5      | Male     | Others    |
| HP245 | 1–5      | Male     | Others    |
| HP246 | 6–10     | Female   | Others    |
| HP248 | 1–5      | Un-known | Others    |
| HP249 | 6–10     | Male     | Others    |
| HP252 | 1–5      | Un-known | Others    |
| HP254 | <1       | Male     | Others    |
| HP256 | 1–5      | Un-known | Others    |
| HP259 | 1–5      | Un-known | Others    |
| HP260 | 1–5      | Un-known | Others    |
| HP261 | 1–5      | Un-known | Health    |
| HP262 | 6–10     | Female   | Others    |
| HP263 | 1–5      | Un-known | Others    |
| HP264 | <1       | Un-known | Others    |
| HP265 | <1       | Un-known | Others    |
| HP266 | <1       | Un-known | Others    |
| HP267 | 1–5      | Un-known | Health    |
| HP268 | 1–5      | Female   | Un-known  |

|         |          |          |            |                                 |         |
|---------|----------|----------|------------|---------------------------------|---------|
| HP270   | <1       | Un-known | Others     | Chong Yisheng, Central Hospital | Pet dog |
| HP271   | <1       | Female   | Diar-rheic |                                 |         |
| HP272   | 1–5      | Female   | Others     |                                 |         |
| HP273   | <1       | Male     | Diar-rheic |                                 |         |
| HP276   | <1       | Female   | Others     |                                 |         |
| HP277   | >10      | Female   | Others     |                                 |         |
| HP278   | >10      | Female   | Others     |                                 |         |
| HP279   | 1–5      | Female   | Health     |                                 |         |
| HP280   | 6–10     | Female   | Health     |                                 |         |
| HP282   | <1       | Un-known | Health     |                                 |         |
| HP283   | <1       | Un-known | Health     |                                 |         |
| HP284   | 1–5      | Male     | Health     |                                 |         |
| HP286   | 1–5      | Un-known | Health     |                                 |         |
| HP287   | 1–5      | Un-known | Health     |                                 |         |
| HP288   | 1–5      | Un-known | Health     |                                 |         |
| HP289   | <1       | Un-known | Health     |                                 |         |
| HP290   | <1       | Un-known | Health     |                                 |         |
| HP292   | <1       | Un-known | Health     |                                 |         |
| HP293   | <1       | Un-known | Diar-rheic |                                 |         |
| HP296   | <1       | Female   | Health     |                                 |         |
| HP297   | <1       | Male     | Health     |                                 |         |
| HP300   | 1–5      | Un-known | Others     |                                 |         |
| HP302   | <1       | Un-known | Diar-rheic |                                 |         |
| HP305   | <1       | Un-known | Others     |                                 |         |
| HP306   | Un-known | Un-known | Un-known   |                                 |         |
| HC1-1dc | Un-known | Un-known | Un-known   |                                 |         |
| HC1-3dc | Un-known | Un-known | Un-known   |                                 |         |
| HC1-5dc | Un-known | Un-known | Un-known   |                                 |         |
| HC1-6dc | Un-known | Un-known | Un-known   |                                 |         |
| HC1-8dc | Un-known | Un-known | Un-known   |                                 |         |



|          |          |          |          |                              |         |
|----------|----------|----------|----------|------------------------------|---------|
| HC1-14dc | Un-known | Un-known | Un-known |                              |         |
| HC1-15dc | Un-known | Un-known | Un-known |                              |         |
| HC1-16dc | Un-known | Un-known | Un-known |                              |         |
| HC1-18dc | Un-known | Un-known | Un-known |                              |         |
| HC1-20dc | Un-known | Un-known | Un-known |                              |         |
| HC1-22dc | Un-known | Un-known | Un-known |                              |         |
| HC1-24dc | Un-known | Un-known | Un-known |                              |         |
| HC1-26dc | Un-known | Un-known | Un-known |                              |         |
| HC1-27dc | Un-known | Un-known | Un-known |                              |         |
| HC1-28dc | Un-known | Un-known | Un-known |                              |         |
| HC1-32dc | Un-known | Un-known | Un-known |                              |         |
| HC1-37dc | Un-known | Un-known | Un-known |                              |         |
| HC1-38dc | Un-known | Un-known | Un-known |                              |         |
| HC1-39dc | Un-known | Un-known | Un-known |                              |         |
| HC1-40dc | Un-known | Un-known | Un-known |                              |         |
| HC1-41dc | Un-known | Un-known | Un-known |                              |         |
| HC1-43dc | Un-known | Un-known | Un-known |                              |         |
| HC1-46dc | Un-known | Un-known | Un-known |                              |         |
| HC1-48dc | Un-known | Un-known | Un-known |                              |         |
| HC1-49dc | Un-known | Un-known | Un-known |                              |         |
| HC1-51dc | Un-known | Un-known | Un-known |                              |         |
| HC1-52dc | Un-known | Un-known | Un-known |                              |         |
| HC1-55dc | Un-known | Un-known | Un-known |                              |         |
| HC1-57dc | Un-known | Un-known | Un-known |                              |         |
| HC2-2dc  | Un-known | Un-known | Un-known | Chong Yisheng, Yangpu Street | Pet dog |

|      |            |          |          |            |                                                  |         |
|------|------------|----------|----------|------------|--------------------------------------------------|---------|
|      | HC2-9dc    | Un-known | Un-known | Un-known   |                                                  |         |
|      | HC2-31dc   | Un-known | Un-known | Un-known   |                                                  |         |
|      | HC2-33dc   | Un-known | Un-known | Un-known   |                                                  |         |
|      | HC2-50-1dc | Un-known | Un-known | Un-known   |                                                  |         |
|      | HC2-51dc   | Un-known | Un-known | Un-known   |                                                  |         |
|      | HC3-4dc    | Un-known | Un-known | Un-known   | Animal Hospital of Jilin Agricultural University | Pet dog |
|      | HC3-10dc   | Un-known | Un-known | Un-known   |                                                  |         |
|      | HC4-3dc    | Un-known | Un-known | Un-known   |                                                  |         |
|      | HC4-7dc    | Un-known | Un-known | Un-known   |                                                  |         |
|      | HC4-10dc   | Un-known | Un-known | Un-known   | Dr. xie                                          | Pet dog |
|      | HC4-13dc   | Un-known | Un-known | Un-known   |                                                  |         |
|      | HC4-14dc   | Un-known | Un-known | Un-known   |                                                  |         |
| 2021 | HP1        | 6–10     | Male     | Health     |                                                  |         |
|      | HP2        | 6–10     | Male     | Others     |                                                  |         |
|      | HP3        | 1–5      | Male     | Others     |                                                  |         |
|      | HP7        | <1       | Male     | Un-known   |                                                  |         |
|      | HP10       | <1       | Male     | Health     |                                                  |         |
|      | HP11       | 1–5      | Male     | Health     |                                                  |         |
|      | HP12       | 1–5      | Male     | Diar-rheic |                                                  |         |
|      | HP13       | 1–5      | Female   | Health     |                                                  |         |
|      | HP14       | 1–5      | Female   | Health     |                                                  |         |
|      | HP15       | 1–5      | Male     | Diar-rheic |                                                  |         |
|      | HP16       | 1–5      | Male     | Others     | Zhou Ping Pet Hospital                           | Pet cat |
|      | HP17       | <1       | Female   | Diar-rheic |                                                  |         |
|      | HP20       | <1       | Female   | Diar-rheic |                                                  |         |
|      | HP23       | <1       | Female   | Health     |                                                  |         |
|      | HP24       | <1       | Male     | Health     |                                                  |         |
|      | HP25       | Un-known | Un-known | Un-known   |                                                  |         |
|      | HP27       | 1–5      | Male     | Others     |                                                  |         |
|      | HP28       | <1       | Female   | Diar-rheic |                                                  |         |
|      | HP31       | Un-known | Un-known | Diar-rheic |                                                  |         |

|      |      |          |            |
|------|------|----------|------------|
| HP34 | <1   | Un-known | Un-known   |
| HP39 | 1–5  | Male     | Others     |
| HP40 | <1   | Male     | Others     |
| HP42 | >10  | Female   | Others     |
| HP44 | 6–10 | Un-known | Un-known   |
| HP45 | 1–5  | Male     | Others     |
| HP46 | <1   | Male     | Diar-rheic |
| HP53 | <1   | Un-known | Health     |
| HP54 | <1   | Male     | Health     |
| HP55 | <1   | Male     | Health     |
| HP56 | <1   | Male     | Health     |
| HP60 | 1–5  | Male     | Others     |
| HP61 | 1–5  | Female   | Others     |
| HP62 | 1–5  | Male     | Others     |
| HP64 | <1   | Male     | Diar-rheic |
| HP65 | 1–5  | Male     | Health     |
| HP67 | <1   | Male     | Others     |
| HP69 | 1–5  | Female   | Health     |
| HP72 | <1   | Un-known | Others     |
| HP73 | 1–5  | Un-known | Others     |
| HP74 | <1   | Female   | Health     |
| HP75 | <1   | Un-known | Diar-rheic |
| HP76 | 1–5  | Un-known | Others     |
| HP77 | <1   | Un-known | Others     |
| HP78 | <1   | Un-known | Others     |
| HP79 | 1–5  | Un-known | Health     |
| HP80 | 1–5  | Un-known | Health     |
| HP86 | <1   | Male     | Health     |
| HP87 | 1–5  | Un-known | Others     |
| HP88 | 1–5  | Male     | Others     |
| HP90 | <1   | Un-known | Diar-rheic |
| HP91 | 1–5  | Un-known | Health     |
| HP93 | <1   | Un-known | Diar-rheic |

|       |          |          |            |
|-------|----------|----------|------------|
| HP94  | 1–5      | Un-known | Others     |
| HP95  | <1       | Male     | Health     |
| HP97  | 1–5      | Female   | Health     |
| HP98  | 1–5      | Male     | Health     |
| HP99  | 1–5      | Male     | Health     |
| HP100 | 1–5      | Un-known | Others     |
| HP101 | 1–5      | Un-known | Others     |
| HP102 | >10      | Un-known | Others     |
| HP107 | 1–5      | Male     | Health     |
| HP110 | 1–5      | Male     | Others     |
| HP111 | 1–5      | Male     | Others     |
| HP112 | <1       | Female   | Diar-rheic |
| HP113 | 1–       | Un-known | Health     |
| HP114 | <1       | Male     | Diar-rheic |
| HP115 | <1       | Un-known | Others     |
| HP116 | Un-known | Un-known | Un-known   |
| HP117 | Un-known | Un-known | Un-known   |
| HP118 | Un-known | Un-known | Un-known   |
| HP120 | Un-known | Un-known | Un-known   |

Table S10. PCR primers and conditions.

| Target                     | Primer     | Sequence (5'–3')         | Fragment size | Reference |
|----------------------------|------------|--------------------------|---------------|-----------|
| <i>E.coli</i> 16S rDNA     | F          | TGTGGGAACGGCGAGTCGGAATAC | 1467          | [54]      |
|                            | R          | GGGCGCAGGGGATGAAACTCAAC  |               |           |
| <i>chuA</i>                | chuA.1b    | ATGGTACCGGACGAACCAAC     | 288           |           |
|                            | chuA.2     | TGCCGCCAGTACCAAAGACA     |               |           |
| <i>yjaA</i>                | yjaA.1b    | CAAACGTGAAGTGTCAGGAG     | 211           | [57]      |
|                            | yjaA.2b    | AATGCGTTCCTCAACCTGTG     |               |           |
| <i>TspE4C2</i>             | TspE4C2.1b | CACTATTCGTAAGGTCATCC     | 152           |           |
|                            | TspE4C2.2b | AGTTTATCGCTGCGGGTTCGC    |               |           |
| <i>arpA</i>                | AceK.f     | AACGCTATTCGCCAGCTTGC     | 400           |           |
|                            | ArpA1.r    | TCTCCCCATACCGTACGCTA     |               |           |
| <i>bla<sub>CTX-M</sub></i> | CTX-MU1    | ATGTGCAGYACCAGTAARGT     | 544           | [58]      |
|                            | CTX-MU2    | TGGGTRAARTARGTSACCAGA    |               |           |
| <i>bla<sub>SHV</sub></i>   | SHV-F      | ATTTGTCGCTTCTTTACTCGC    | 1018          |           |
|                            | SHV-R      | TTTATGGCGTTACCTTTGACC    |               |           |

|                             |                  |                                            |     |      |
|-----------------------------|------------------|--------------------------------------------|-----|------|
| <i>bla</i> <sub>TEM</sub>   | TEM-F            | ATGAGTATTCAACATTTCCGT                      | 861 | [59] |
|                             | TEM-R            | TTACCAATGCTTAATCAGTGA                      |     |      |
| <i>bla</i> <sub>OXA-1</sub> | O-for            | GGCACCAGATTCAACTTTCAAG                     | 564 | [60] |
|                             | O-rev            | GACCCCAAGTTTCCTGTAAGTG                     |     |      |
| <i>tet</i> (A)              | tet(A)-F         | GTAATTCTGAGCACTGTGCGC                      | 956 | [61] |
|                             | tet(A)-R         | CTGCCTGGACAACATTGCTT                       |     |      |
| <i>tet</i> (B)              | tet(B)-F         | CTCAGTATTCCAAGCCTTTG                       | 414 |      |
|                             | tet(B)-R         | ACTCCCCTGAGCTTGAGGGG                       |     |      |
| <i>tet</i> (M)              | tet(M)-F         | GTGGACAAAGGTACAACGAG                       | 406 | [62] |
|                             | tet(M)-R         | CGGTAAAGTTCGTCACACAC                       |     |      |
| <i>tet</i> (X1)             | tet(X1) -F       | CGAAAAATGTTGCTTGGCAGCTT                    | 486 |      |
|                             | tet(X1) -R       | AGTTGTTGAACGAATTAAGTCC                     |     |      |
| <i>tet</i> (X2)             | tet(X2) -F       | CGGGATGTCCAAGGTAAGAAAA                     | 343 |      |
|                             | tet(X2) -R       | TGACAACGTCGTATGAATCAA                      |     |      |
| <i>tet</i> (X3)             | tet(X3) -F       | GACACTTGATCTGCACAGGGATT                    | 685 | [63] |
|                             | tet(X3) -R       | CCCTACAAAAGATGATGTCAAAC                    |     |      |
| <i>tet</i> (X4)             | tet(X4) -F       | CTGATTCGTGTGACATCATCTTTTG                  | 204 |      |
|                             | tet(X4) -R       | GTTAAATTTCCCATTTGGTCAGATTA                 |     |      |
| <i>tet</i> (X5)             | tet(X5) -F       | GGTATCAACATTTCAATGCTTG                     | 265 |      |
|                             | tet(X5) -R       | CGATTCGTCCTGCGTATCTTTTG                    |     |      |
| <i>sul1</i>                 | sul1-F           | CACCGGAAACATCGCTGCA                        | 158 |      |
|                             | sul1-R           | AAGTTCCGCCGCAAGGCT                         |     |      |
| <i>sul2</i>                 | sul2-F           | CTCCGATGGAGGCCGGTAT                        | 190 | [64] |
|                             | sul2-R           | GGGAATGCCATCTGCCTTGA                       |     |      |
| <i>sul3</i>                 | sul3-F           | CCCATACCCGGATCAAGAATAA                     | 143 |      |
|                             | sul3-R           | CAGCGAATTGGTGCAGCTACTA                     |     |      |
| <i>floR</i>                 | floR-F           | GGCTTTCGTCAATTGCGTCTC                      | 650 | [47] |
|                             | floR-R           | ATCGGTAGGATGAAGGTGAGGA                     |     |      |
| <i>cmlA</i>                 | cmlA-F           | TGCCAGCAGTGCCGTTTAT                        | 900 |      |
|                             | cmlA-R           | CACCGCCCAAGCAGAAGTA                        |     |      |
| <i>qnrA</i>                 | qnrA-F           | ATTTCTCACGCCAGGATTG                        | 516 |      |
|                             | qnrA-R           | GATCGGCAAAGGTTAGGTCA                       |     |      |
| <i>qnrB</i>                 | qnrB-F           | GATCGTGAAAGCCAGAAAGG                       | 469 | [65] |
|                             | qnrB-R           | ACGATGCCTGGTAGTTGTCC                       |     |      |
| <i>qnrS</i>                 | qnrS-F           | ACGACATTCGTCAACTGCAA                       | 417 |      |
|                             | qnrS-R           | TAAATTGGCACCCCTGTAGGC                      |     |      |
| <i>qnrC</i>                 | qnrC-F           | GGGTTGTACATTTATTGAATCG                     | 307 | [66] |
|                             | qnrC-R           | CACCTACCCATTTATTTTCA                       |     |      |
| <i>aac</i> (6')-Ib-cr       | aac (6')-Ib-cr-F | ATATGCG-<br>GATCCAAAAACAAAGTTAGGCATCACAAG  | 810 | [67] |
|                             | aac (6')-Ib-cr-R | ATATGCGAATTCCTTCAGTTCCTTCAAA-<br>TAATGGAGA |     |      |
| <i>rmtB</i>                 | rmtB-F           | ACATCAACGATGCCCTCAC                        | 725 | [68] |
|                             | rmtB-R           | AAGTTCTGTTCCGATGGTC                        |     |      |
| <i>armA</i>                 | armA-F           | ATGGATAAGAATGATGTTGTTAAG                   | 774 |      |
|                             | armA-R           | TTATTTCTGAAATCCACTAGTAATTA                 |     |      |
| <i>aac</i> (3)- II          | aac(3)- II -F    | ACTGTGATGGGATACGCGTC                       | 237 | [69] |
|                             | aac(3)- II -R    | CTCCGTCAGCGTTTCAGCTA                       |     |      |
| <i>aac</i> (6')-Ib          | aac (6')-Ib-F    | ATGACTGAGCATGACCTTGC                       | 519 |      |
|                             | aac (6')-Ib-R    | TAGGCATCACTGCGTGTTT                        |     |      |
| <i>bla</i> <sub>IMP</sub>   | IMP-F            | GGAATAGAGTGGCTTAAYTCTC                     | 232 | [70] |

|                           |       |                         |      |      |
|---------------------------|-------|-------------------------|------|------|
| <i>bla</i> <sub>KPC</sub> | IMP-R | GGTTTAAYAAAACAACCACC    | 893  | [71] |
|                           | KPC-F | ATGTCACGTGTATCGCCGTCT   |      |      |
|                           | KPC-R | TTTTCAGAGCCTTACTGCCC    |      |      |
| <i>bla</i> <sub>NDM</sub> | NDM-F | TCGCCCCATATTTTGTCTAC    | 1080 | [72] |
|                           | NDM-R | CTGGGTCGAGGTCAGGATAG    |      |      |
| <i>mcr-1</i>              | F     | AGTCCGTTTGTCTTGTGGC     | 320  |      |
|                           | R     | AGATCCTTGGTCTCGGCTTG    |      |      |
| <i>mcr-2</i>              | F     | CAAGTGTGTTGGTCGCAGTT    | 715  |      |
|                           | R     | TCTAGCCCCGACAAGCATACC   |      |      |
| <i>mcr-3</i>              | F     | AAATAAAAATTGTTCCGCTTATG | 929  | [73] |
|                           | R     | AATGGAGATCCCCGTTTTT     |      |      |
| <i>mcr-4</i>              | F     | TCACCTTCATCACTGCGTTG    | 1116 |      |
|                           | R     | TTGGTCCATGACTACCAATG    |      |      |
| <i>mcr-5</i>              | F     | ATGCGGTTGTCTGCATTATC    | 1644 |      |
|                           | R     | TCATTGTGGTTGTCCTTTTCTG  |      |      |

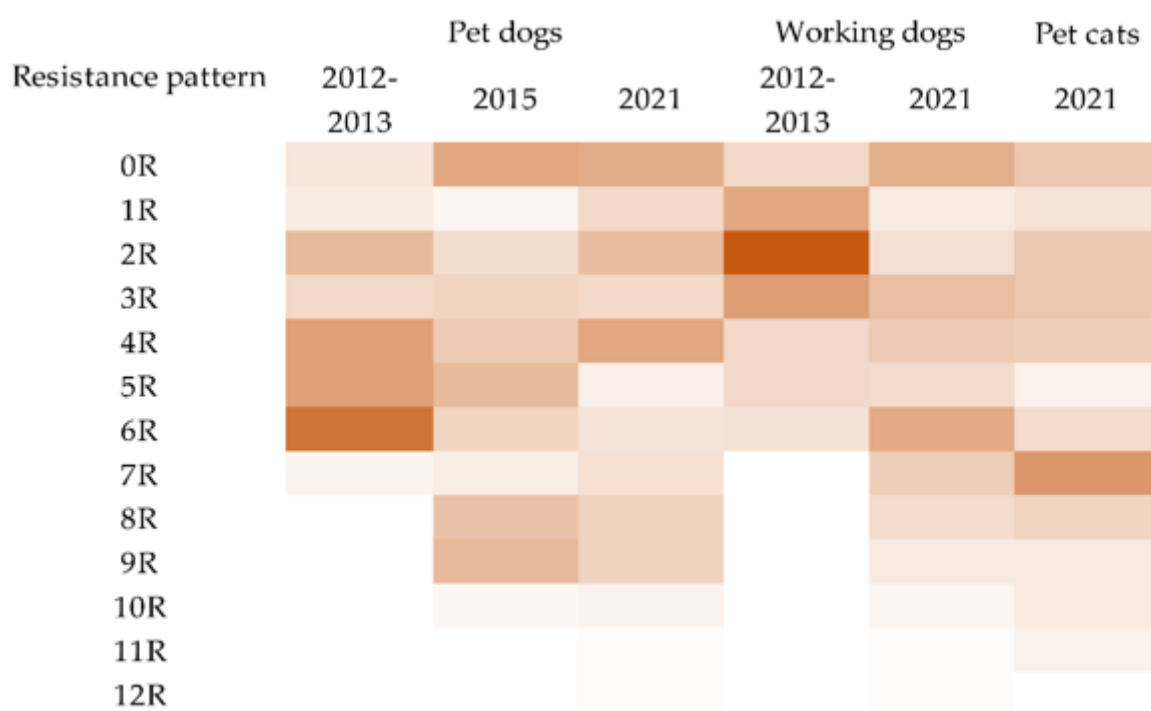

**Figure S1.** Drug resistance pattern of *E. coli*.
